# Supplementary material
Source: Springer Nature journal article supplement (https://www.springermedizin.de/resource/supplementary/12993_2012_452_MOESM6_ESM.pdf/9617790)

**A**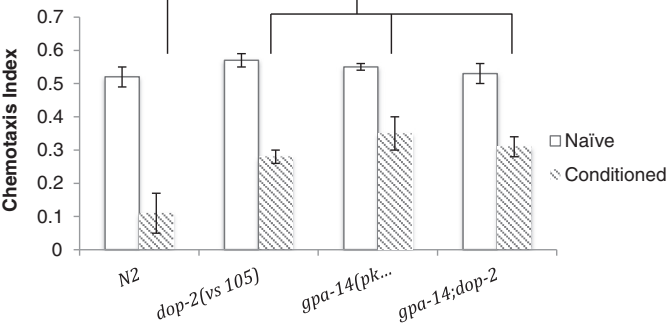**B**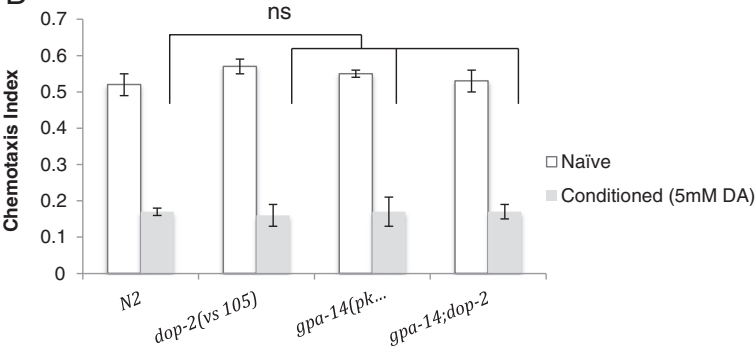**C**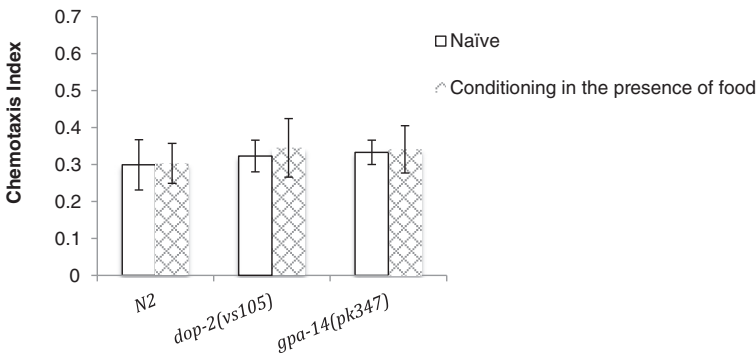

Supplement: MOESM6 [file 9617790]
